# Supplementary material
Source: PubMed Central journal article supplement (PMC10022479)
Supplement: NIHMS1874841-supplement-PCP_survey.pdf [file NIHMS1874841-supplement-PCP_survey.pdf]

# PCP Telehealth survey

Thank you for agreeing to participate in our study. Please complete the survey below. You may complete it in multiple sittings if you wish.

---

Telemedicine is defined as the provision of primary care remotely through telephone and/or video based visits. Have you provided primary care via telemedicine to adults aged 65 and older since the pandemic?

- Yes  
 No

---

If yes,

- I have provided telemedicine to adults aged 65 and older since the pandemic only via telephone.  
 I have provided telemedicine to adults aged 65 and older since the pandemic only via video conferencing.  
 I have provided telemedicine to adults aged 65 and older since the pandemic using telephone and video conferencing.  
 I do not provide care to adults aged 65 and older.  
 Other

---

Please define other:

---

---

Before the coronavirus pandemic had you provided telemedicine primary care to adults aged 65 and older?

- No  
 Yes  
 Other

---

Please define other:

---

**We are interested to learn your thoughts regarding the quality of primary care delivery via telehealth. Please answer how strongly you agree with the following statements using the scale from 1 to 7 where 7 indicates you strongly agree and 1 indicates you strongly disagree with the statement; 4 indicates you feel neutral about the statement.**

|                                                                                                                                                  | 1 (Strongly disagree) | 2                     | 3                     | 4 (Neutral)           | 5                     | 6                     | 7 (Strongly agree)    |
|--------------------------------------------------------------------------------------------------------------------------------------------------|-----------------------|-----------------------|-----------------------|-----------------------|-----------------------|-----------------------|-----------------------|
| High quality primary care may be delivered via telemedicine to adults aged 65 and older.                                                         | <input type="radio"/> |
| High quality primary care may be delivered via telemedicine regardless of patient age.                                                           | <input type="radio"/> |
| The quality of primary care delivered via telemedicine is equivalent to an in person visit for adults aged 65 and older.                         | <input type="radio"/> |
| In general, the quality of primary care delivered through a telephone visit is equivalent to that of a video visit for adults aged 65 and older. | <input type="radio"/> |
| In general, the quality of primary care delivered through a telephone visit is equivalent to a video visit regardless of patient age.            | <input type="radio"/> |
| Compared to telemedicine with adults < 65 years, on average telemedicine is more challenging with adults aged 65 and older.                      | <input type="radio"/> |
| Compared to telemedicine with adults < 75 years, on average telemedicine is more challenging with adults aged 75 and older.                      | <input type="radio"/> |

**We are also interested in your thoughts on how older adults are managing their health during the pandemic. Please answer the following questions using the 1-7 scale below, where 7 indicates you strongly agree and 1 indicates you strongly disagree with the statement; 4 indicates you feel neutral about the statement.**

|                                                                                                                                               | 1 (Strongly disagree) | 2                     | 3                     | 4 (Neutral)           | 5                     | 6                     | 7 (Strongly agree)    |
|-----------------------------------------------------------------------------------------------------------------------------------------------|-----------------------|-----------------------|-----------------------|-----------------------|-----------------------|-----------------------|-----------------------|
| I am confident that I can engage my established primary care patients aged 65 and older in a high quality telemedicine visit.                 | <input type="radio"/> |
| I am confident that I can engage my colleagues' primary care patients aged 65 and older in a high quality telemedicine visit for urgent care. | <input type="radio"/> |
| I am confident that I can diagnose a new medical problem in adults aged 65 and older via telemedicine.                                        | <input type="radio"/> |
| I am confident that I can manage chronic medical problems in adults aged 65 and older via telemedicine.                                       | <input type="radio"/> |
| I feel confident in my ability to use the telephone to provide primary care to adults aged 65 and older.                                      | <input type="radio"/> |
| I feel confident in my ability to use video conferencing to provide primary care to adults aged 65 and older.                                 | <input type="radio"/> |

**The next set of questions inquire about your satisfaction with providing primary care via telehealth. Please answer how strongly you agree with the statements below using the scale from 1 to 7 where 7 indicates you strongly agree and 1 indicates you strongly disagree with the statement; 4 indicates you feel neutral about the statement.**

|                                                                                                                        | 1 (Strongly disagree) | 2                     | 3                     | 4 (Neutral)           | 5                     | 6                     | 7 (Strongly agree)    |
|------------------------------------------------------------------------------------------------------------------------|-----------------------|-----------------------|-----------------------|-----------------------|-----------------------|-----------------------|-----------------------|
| I am satisfied with the quality of primary care I deliver via telemedicine to adults aged 65 and older.                | <input type="radio"/> |
| I am pleased that I can now provide primary care to adults aged 65 and older via telemedicine.                         | <input type="radio"/> |
| I am pleased that I can now provide primary care via telemedicine regardless of patient age.                           | <input type="radio"/> |
| I am worried that after the pandemic offering telemedicine will increase my workload.                                  | <input type="radio"/> |
| I enjoy providing primary care via telemedicine as much as I do providing in person care for adults aged 65 and older. | <input type="radio"/> |
| I enjoy providing primary care via telemedicine as much as I do providing in person care regardless of patient age     | <input type="radio"/> |
| I prefer to provide primary care in person rather than via telemedicine for adults aged 65 and older.                  | <input type="radio"/> |
| I prefer to provide primary care in person rather than via telemedicine regardless of patient age.                     | <input type="radio"/> |

**The next set of questions inquire about your thoughts on benefits versus disadvantages of telemedicine. Please answer how strongly you agree with the statements below using the scale from 1 to 7 where 7 indicates you strongly agree and 1 indicates you strongly disagree with the statement; 4 indicates you feel neutral about the statement.**

|                                                                                                                                              | 1 (Strongly disagree) | 2                     | 3                     | 4 (Neutral)           | 5                     | 6                     | 7 (Strongly agree)    |
|----------------------------------------------------------------------------------------------------------------------------------------------|-----------------------|-----------------------|-----------------------|-----------------------|-----------------------|-----------------------|-----------------------|
| After the pandemic, reimbursement for telemedicine should be the same as for an in person visit.                                             | <input type="radio"/> |
| Avoiding the need for transportation is a major benefit of telemedicine for adults aged 65 and older.                                        | <input type="radio"/> |
| Telemedicine is less costly for adults aged 65 and older than in person primary care.                                                        | <input type="radio"/> |
| Telemedicine helps to avoid delays in care among adults 65 and older during the pandemic.                                                    | <input type="radio"/> |
| Video usually provides adequate visualization to diagnose most new medical problems.                                                         | <input type="radio"/> |
| Adults aged 65 and older are adherent to government recommendations for physical distancing during the pandemic.                             | <input type="radio"/> |
| Adults aged 65 and older are more adherent to government recommendations for physical distancing during the pandemic than adults < 65 years. | <input type="radio"/> |
| I am worried about the effects of social isolation among adults aged 65 and older during the pandemic.                                       | <input type="radio"/> |
| I am worried about the effects of social isolation for all adults regardless of age during the pandemic.                                     | <input type="radio"/> |

Due to the pandemic, adults aged 65 and older are less enthusiastic about colon cancer screening than they were before the pandemic.

Due to the pandemic, women aged 65 and older are less enthusiastic about mammography screening than they were before the pandemic

I anticipate that even after the pandemic adults aged 65 and older will be less enthusiastic about colon cancer screening than they were before the pandemic.

I anticipate that even after the pandemic women aged 65 and older will be less enthusiastic about mammography screening than they were before the pandemic.

**The next set of questions inquire about your intentions to continue to use telemedicine to deliver primary care. Please answer how strongly you agree with the statements below using the scale from 1 to 7 where 7 indicates you strongly agree and 1 indicates you strongly disagree with the statement; 4 indicates you feel neutral about the statement.**

|                                                                                                                                                        | 1 (Strongly disagree) | 2                     | 3                     | 4 (Neutral)           | 5                     | 6                     | 7 (Strongly agree)    |
|--------------------------------------------------------------------------------------------------------------------------------------------------------|-----------------------|-----------------------|-----------------------|-----------------------|-----------------------|-----------------------|-----------------------|
| I intend to continue to use telemedicine to provide primary care to adults aged 65 and older even after the pandemic.                                  | <input type="radio"/> |
| I intend to continue to use telemedicine to provide primary care regardless of patient age even after the pandemic.                                    | <input type="radio"/> |
| I think that most of my colleagues intend to continue to use telemedicine to provide primary care to adults aged 65 and older even after the pandemic. | <input type="radio"/> |
| I think that most of my colleagues intend to continue to use telemedicine to provide primary care regardless of patient age even after the pandemic.   | <input type="radio"/> |
| In general, most of my colleagues feel that high quality primary care may be delivered via telemedicine to adults aged 65 and older.                   | <input type="radio"/> |

Please share your thoughts on telemedicine for delivery of primary care for adults aged 65 and older?  
\_\_\_\_\_

Please describe any challenging and/or useful experiences that you have had providing telemedicine to adults aged 65 and older?  
\_\_\_\_\_

Please provide any recommendations for improving telemedicine for adults aged 65 and older?  
\_\_\_\_\_

Please explain why you plan or do not plan to continue to provide telemedicine to older adults after the pandemic.  
\_\_\_\_\_

Have you conducted a Medicare Annual Wellness visit via telemedicine?  
 No  
 Yes

---

1 to 7 from strongly disagree to strongly agree: It is challenging to conduct a medicare annual wellness visit via telemedicine

- 1 (Strongly disagree)
- 2
- 3
- 4 (Neutral)
- 5
- 6
- 7 (Strongly agree)

---

Please describe your experience with or thoughts on conducting a Medicare Annual Wellness visit via telemedicine:

\_\_\_\_\_

---

How have stay at home recommendations affected the health of your patients aged 65 and older?

\_\_\_\_\_

---

For your patients aged 65 and older, how has the pandemic affected their intentions to be screened for cancer (e.g to be screened for breast or colon cancer)?

\_\_\_\_\_



**Please answer the following questions about your background.**

What is your role in providing primary care to patients?

- Physician
- Physician Assistant
- Nurse Practitioner
- Other

Please define other

---

What is your specialty?

- Internal Medicine
- Internal Medicine/geriatrics
- Family practice
- Family practice/geriatrics
- Other

Please define other

---

Where do you practice?

- HealthCare Associates (HCA)
- BIDHC Community Practice/Affiliate Group Practice (BIDHC, APG)
- Lahey Health/Lahey Community Practice (GIMP, CGP, LPCO, NMP , WPA)
- Senior Health
- Mount Auburn Health (MAPS)
- Other

Please define other:

---

Approximately what proportion of your patients come from underserved and/or underrepresented backgrounds?

- 1%
- 2-4%
- 5-9%
- 10-20%
- 21-30%
- 31-40%
- 41-50%
- 50-74%
- >75%

How old are you?

- 20-29 years old
- 30-39 years old
- 40-49 years old
- 50-59 years old
- 60-69 years old
- 70 or older

What is your gender?

- Female
- Male

What is your ethnicity?

- Hispanic
- Not Hispanic

---

What is your race?

- White or Caucasian
- Black or African American
- Asian
- American Indian or Alaska Native
- Native Hawaiian or other Pacific Islander
- Other
- Prefer not to answer

---

Please define other:

---

---

How many years has it been since you completed your clinical training (e.g. residency or nursing school)?

- Less than 2 years
- 2 to < 5 years
- 5 to < 10 years
- 10 to < 15 years
- 15 to < 20 years
- 20 to < 25 years
- 25 to < 30 years
- 30 years or more

---

Approximately, how large is your patient panel?

---

---

What proportion of your patients are adults aged 65 and older?

- 1%
- 2-4%
- 5-9%
- 10-20%
- 21-30%
- 31-40%
- 41-50%
- 50-74%
- >75%
